# Supplementary material for: Enhanced photoelectrochemical biosensing performance for Au nanoparticle–polyaniline–TiO2 heterojunction composites
Source: Royal Society of Chemistry journal article supplement (doi:10.1039/d0ra06890j), 2020-01-01
Supplement: d0ra06890j1.pdf [file d0ra06890j1.pdf]

1     **Enhanced photoelectrochemical biosensing performance for Au**  
2             **nanoparticle-polyaniline-TiO<sub>2</sub> heterojunction composites**

3     Bingdong Yan<sup>a</sup>, Xiaoru Zhao<sup>a</sup>, Delun Chen<sup>a</sup>, Yang Cao<sup>a</sup>, Chuanzhu Lv<sup>c</sup>, Jinchun Tu<sup>a</sup>  
4                             Xiaohong Wang<sup>a,\*</sup>, Qiang Wu<sup>b,\*</sup>

5     <sup>a</sup> *State Key Laboratory of Marine Resource Utilization in South China Sea, School of*  
6     *Materials Science and Engineering, Hainan University, Haikou 570228, P. R. China;*

7     <sup>b</sup> *School of Tropical Medicine and Laboratory Medicine, MOE Key Laboratory of*  
8     *Emergency and Trauma, Hainan Medical University, Haikou 571199, P. R. China;*

9     <sup>c</sup> *Research Unit of Island Emergency Medicine, Chinese Academy of Medical Sciences*  
10    *(No. 2019RU013), Hainan Medical University*

11

12

13

14

15

16

17

18

19

20

21

22

23

24

25

26

27

28     \* Corresponding authors.

29     E-mail addresses: wangxiaohong@hainu.edu.cn; wuqiang001001@aliyun.com.

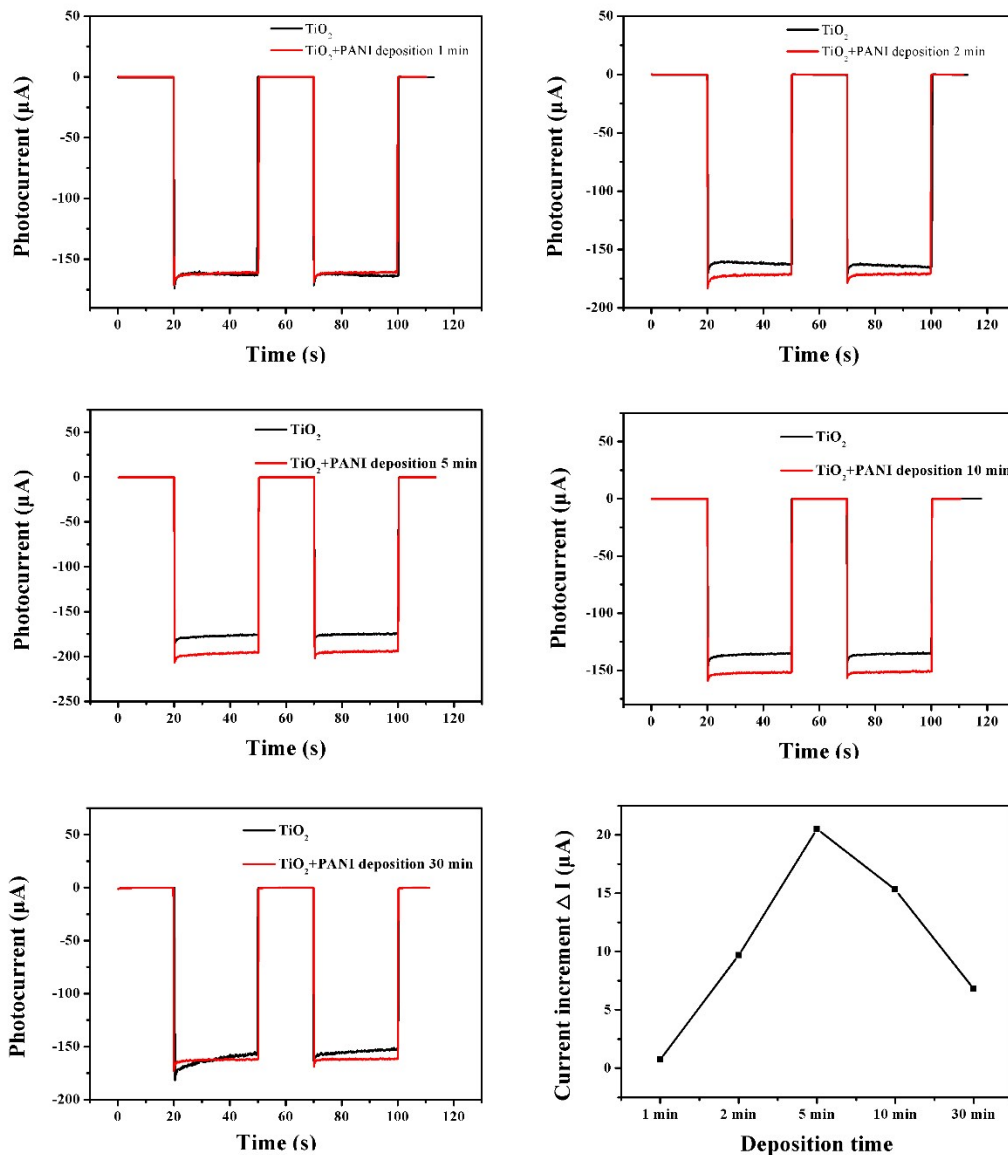

30

31 Fig. S1. Optimization of deposition time. The photocurrent was measured before and after  
 32 polyaniline deposition, and 5 min was selected as the optimum deposition time.

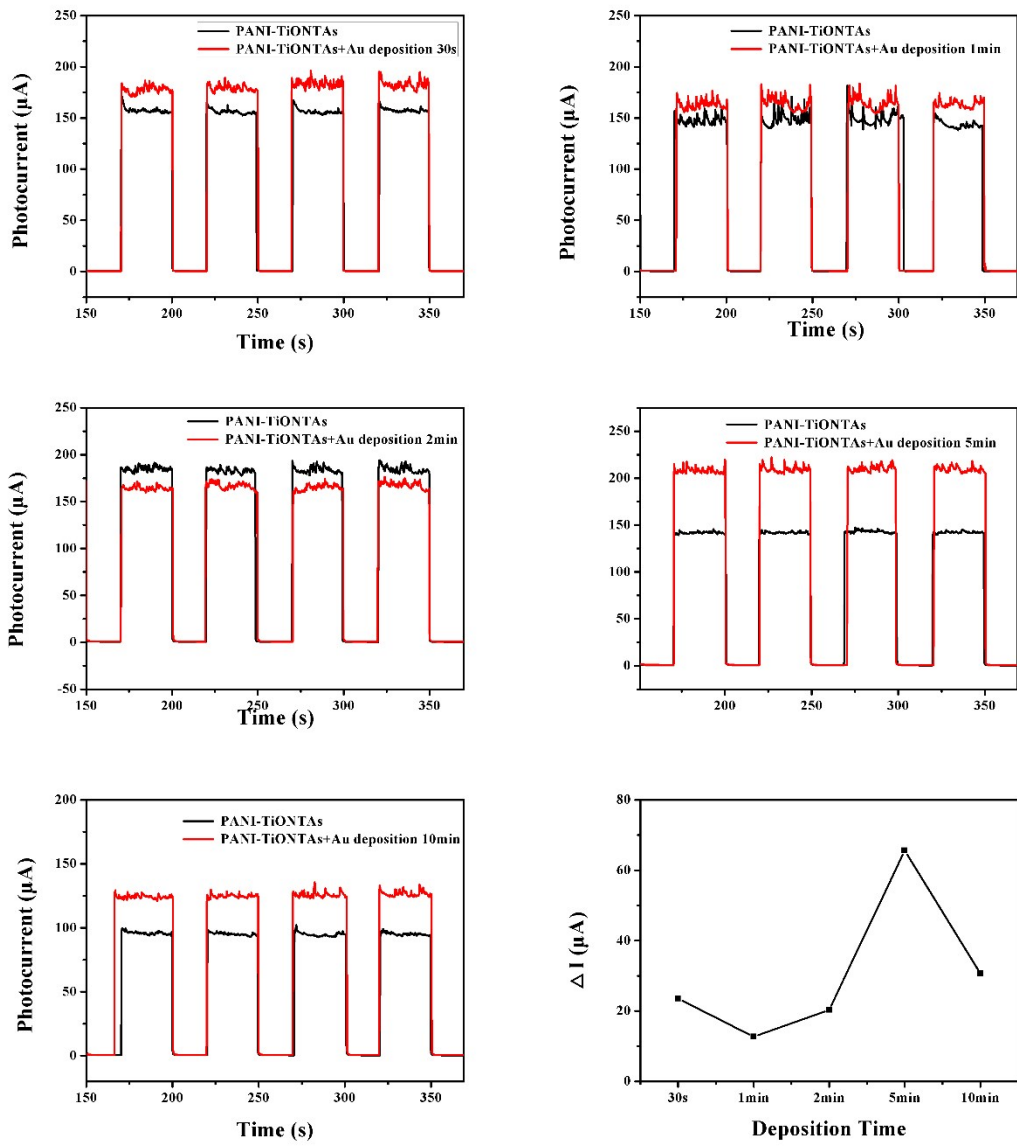

33

34 Fig. S2. Optimization of illumination time. The photocurrents before and after the  
 35 deposition of Au NPs were measured, and 5 min was selected as the optimum  
 36 illumination time.

37

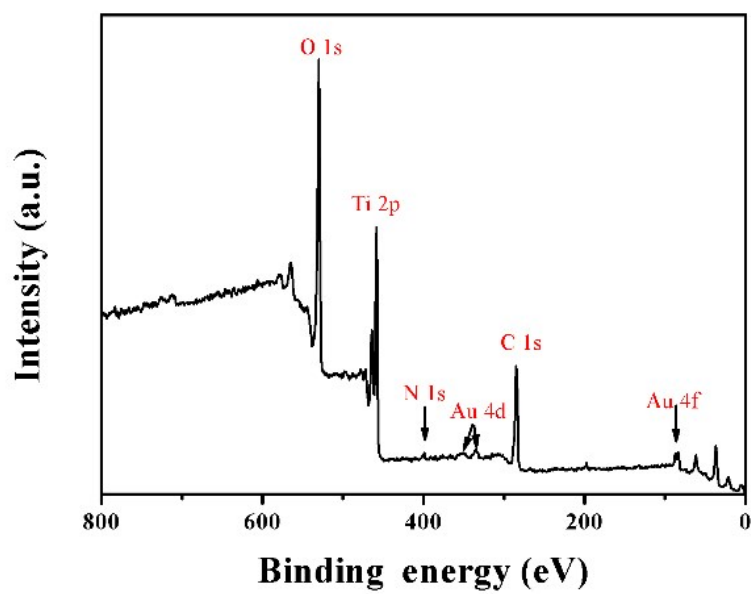

38

39 Fig. S3. Full XPS spectrum of Au-PANI-TiONTAs with Ti 2p, O 1s, C 1s, N 1s, Au 4d,  
40 and Au 4f peaks.

41

43

44 Table S1. Recovery study for determining glucose in human serum.

| $C_{\text{added}}$ (mM) | $C_{\text{found}}$ (mM) | Recovery (%) |
|-------------------------|-------------------------|--------------|
| 3.93                    | 3.78                    | 96.18        |
| 11.19                   | 10.99                   | 98.21        |
| 11.87                   | 11.92                   | 100.42       |

45
